# Supplementary material for: Detection of ESBL/AmpC-Producing and Fosfomycin-Resistant Escherichia coli From Different Sources in Poultry Production in Southern Brazil
Source: PubMed Central journal article supplement (PMC7829455; doi:10.3389/fmicb.2020.604544), 2021-01-11
Supplement: Image_2.pdf [file Image_2.pdf]

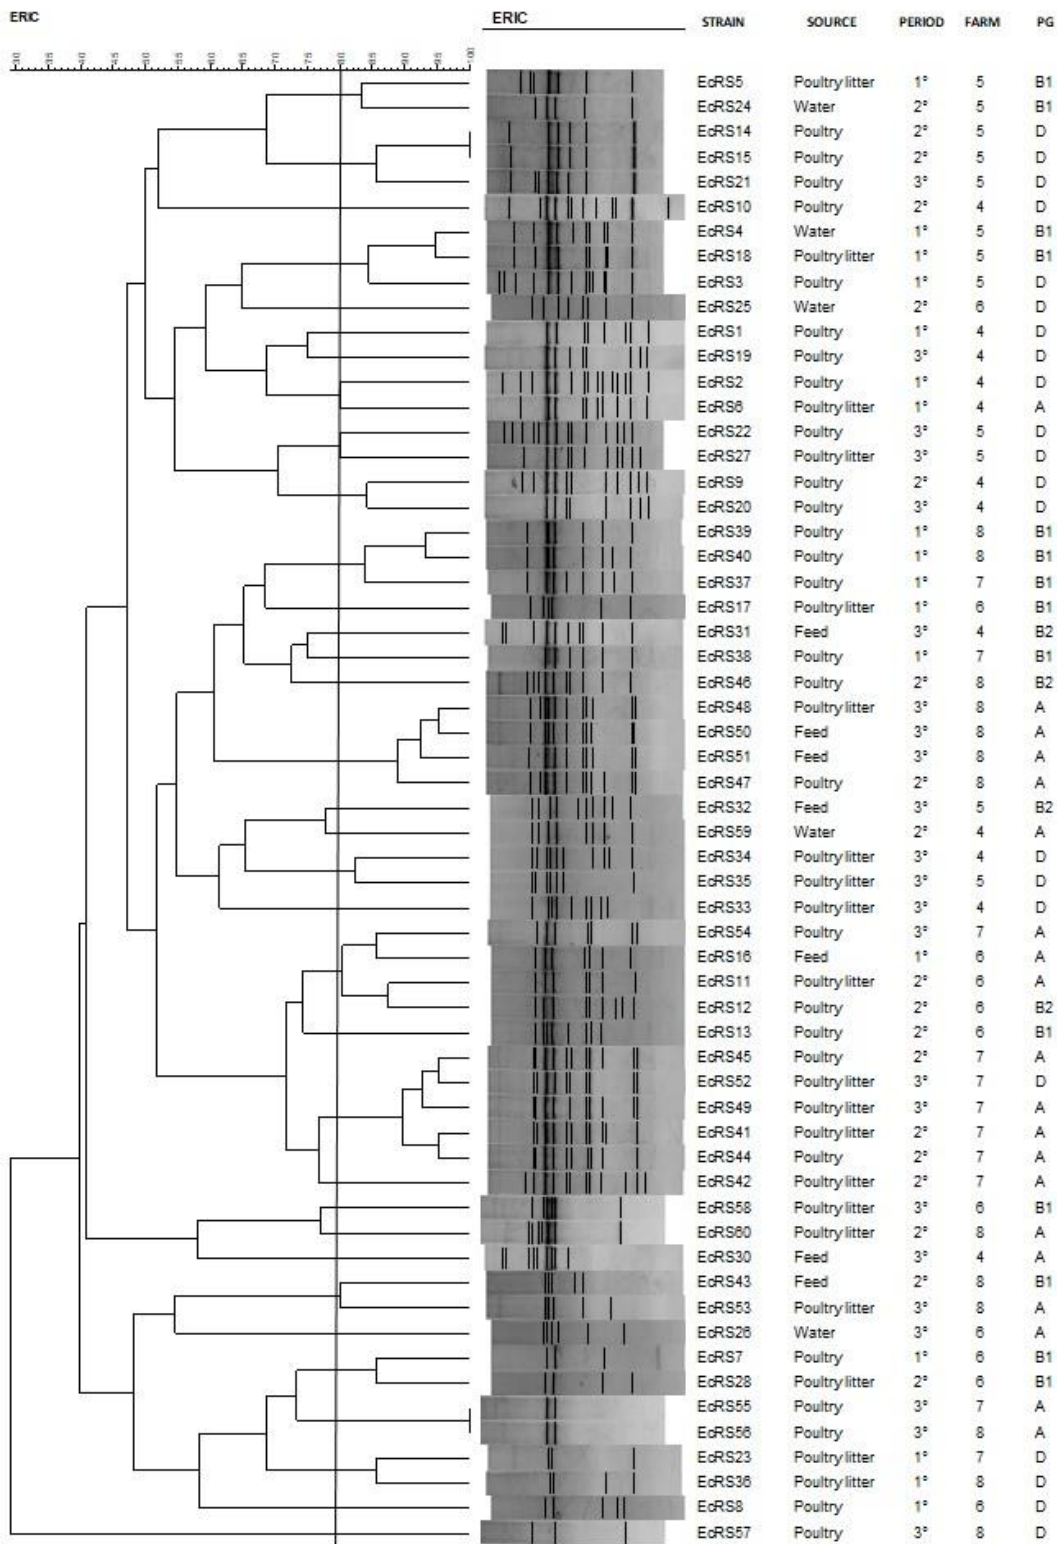

Supplementary data Image 2. ERIC-PCR dendrogram of 59 *E. coli* strains isolated from the RS state poultry farms, with a cut-off of 80% similarity. PG - phylogenetic group.
